# Supplementary material for: Effect of Oleylamine on the Surface Chemistry, Morphology, Electronic Structure, and Magnetic Properties of Cobalt Ferrite Nanoparticles
Source: MDPI journal article supplement (doi:10.3390/nano12173015), 2022-08-31
Supplement: s1 [file nanomaterials-1763572-supplementary.pdf › nanomaterials-1763572-supplementary.pdf]

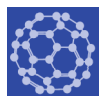

## Article

# Effect of Oleylamine on the Surface Chemistry, Morphology, Electronic Structure, and Magnetic Properties of Cobalt Ferrite Nanoparticles

Sumayya M. Ansari <sup>1</sup>, Bhavesh B. Sinha <sup>2</sup>, Debasis Sen <sup>3,4</sup>, Pulya U. Sastry <sup>3,4</sup>, Yesh D. Kolekar <sup>1,\*</sup> and C. V. Ramana <sup>5,\*</sup>

<sup>1</sup> Department of Physics, Savitribai Phule Pune University, Pune 411 007, Maharashtra, India

<sup>2</sup> National Center for Nanoscience and Nanotechnology, University of Mumbai, Mumbai 400 032, Maharashtra, India

<sup>3</sup> Bhabha Atomic Research Centre (BARC), Solid State Physics Division, Mumbai 400 085, Maharashtra, India

<sup>4</sup> Homi Bhabha National Institute, Anushaktinagar, Mumbai 400 094, Maharashtra, India

<sup>5</sup> Centre for Advanced Materials Research (CMR), University of Texas, El Paso, TX 79968, USA

\* Correspondence: ydkolekar@gmail.com (Y.D.K.); rvchintalapalle@utep.edu (C.V.R.)

## 1. EDS

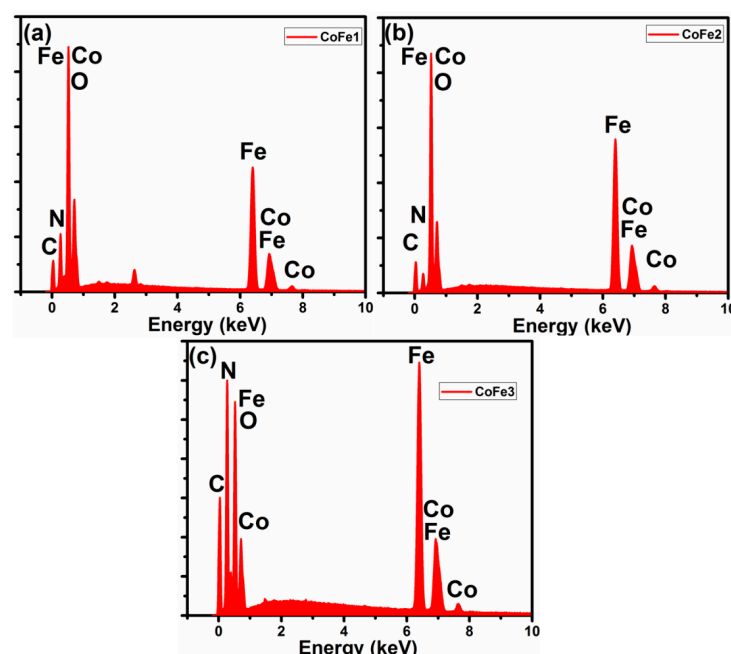

Figure S1. Energy dispersive X-ray spectroscopy (EDS) patterns for CoFe1 (a), CoFe2 (b) and CoFe3 (c) samples.

## 2. SEM

The particle size distribution is calculated from a FESEM micrograph by plotting the histogram and fitted with a log-normal function.

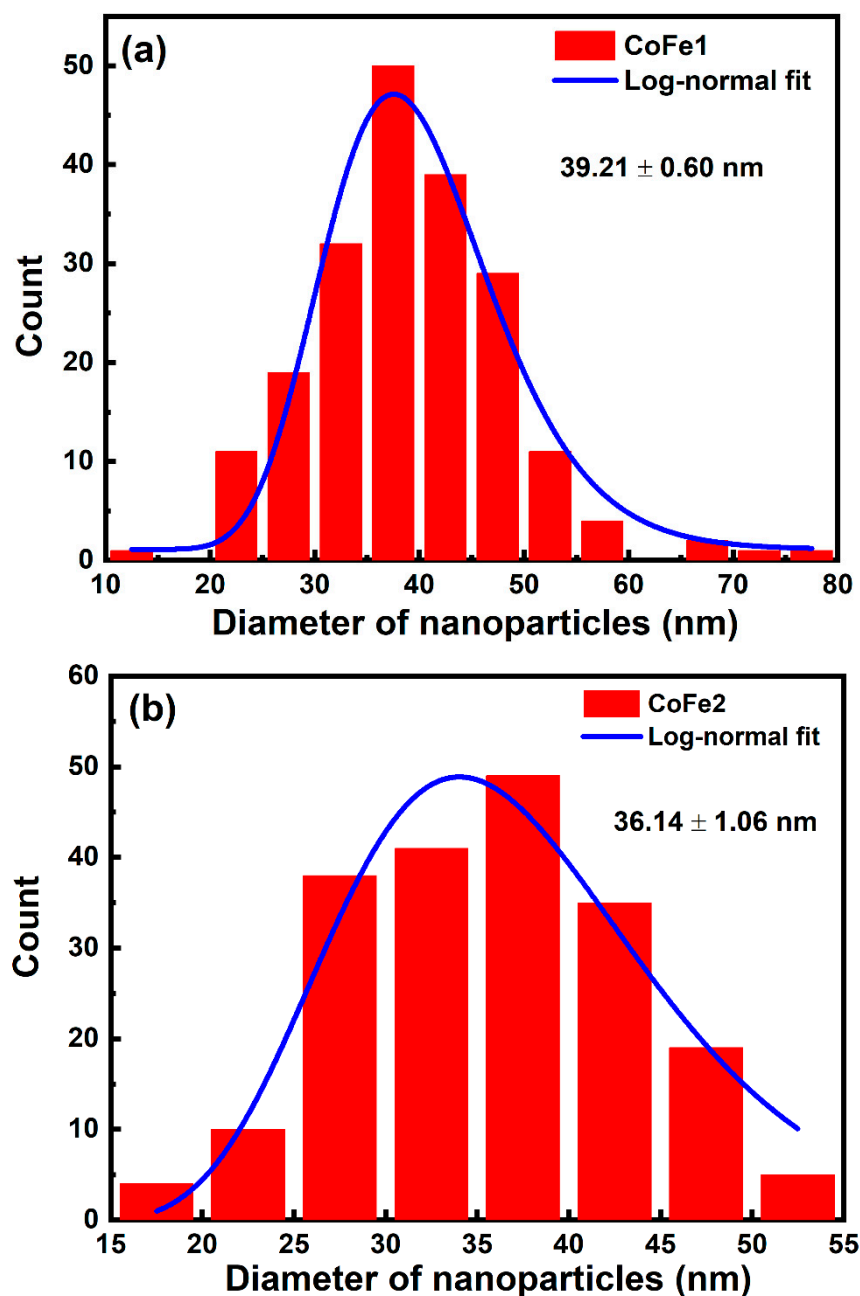

**Figure S2.** Histogram for CoFe1 (a), and CoFe2 (b) samples along with log-normal function showing the size distribution of nanoparticles.

### 3. SAXS Analysis

Small-angle X-ray scattering (SAXS) measurements were carried out using a Rigaku small-angle goniometer mounted on a rotating anode X-ray generator. Scattered X-ray intensity  $I(q)$  was recorded using a scintillation counter with a pulse height analyzer by varying the scattering angle  $2q$  where  $q$  is the scattering vector given by  $4\pi \sin(q)/\lambda$  and  $\lambda$  is the wavelength of incident (Cu  $K\alpha$ ) X-rays. The intensities were corrected for sample absorption and smearing effects of collimating slits [1].

**Table S1.** Structural parameters obtained from SAXS.

| Parameter                                 | Samples | CoFe1 | CoFe2 | CoFe3 |
|-------------------------------------------|---------|-------|-------|-------|
| Outer radius ( $R_1$ , nm)                |         | 5.48  | 4.00  | 3.05  |
| Inner radius ( $R_2$ , nm)                |         | 3.5   | 1.5   | 1.0   |
| The polydispersity index ( $\sigma$ , nm) |         | 0.36  | 0.31  | 0.29  |

|                                         |       |       |       |
|-----------------------------------------|-------|-------|-------|
| The radius of the monomer ( $r_0$ , nm) | 5.61  | 3.49  | 2.17  |
| Size of aggregate ( $x_i$ , nm)         | 11.77 | 13.52 | 27.69 |
| Fractal dimension ( $D$ )               | 3.00  | 3.00  | 3.00  |

#### 4. FTIR

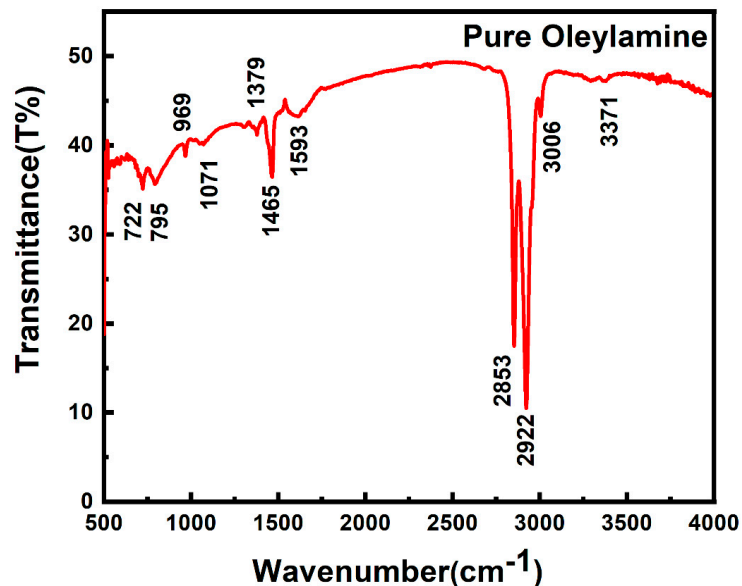

Figure S3. FTIR spectra of pure oleylamine.

Table S2. Infrared vibrational assignments for the pure oleylamine.

| Vibrational modes                                                                                                                    | Frequency ( $\text{cm}^{-1}$ ) |
|--------------------------------------------------------------------------------------------------------------------------------------|--------------------------------|
| $\nu_{\text{as}}(\text{NH}_2)$ and $\nu_{\text{s}}(\text{NH}_2)$                                                                     | 3376, 3300                     |
| $\delta(\text{=C-H})$                                                                                                                | 3006                           |
| $\nu_{\text{as}}(\text{C-H})$ and $\nu_{\text{s}}(\text{C-H})$                                                                       | 2922, 2854                     |
| $\delta(\text{-C=C})$                                                                                                                | 1647                           |
| $\delta(\text{NH}_2)$                                                                                                                | 1593, 795                      |
| $\delta(\text{CH}_3)$                                                                                                                | 1465                           |
| $\delta(\text{C-N})$                                                                                                                 | 1071                           |
| $\delta(\text{C-C})$                                                                                                                 | 722                            |
| $\nu_{\text{as}}$ — asymmetric stretching vibration; $\nu_{\text{s}}$ — symmetric stretching vibration; $\delta$ — Bending vibration |                                |

#### 5. XRD

Table S3. Structural parameters obtained from Rietveld refinement of XRD.

| Sample | Average crystallite size (nm) | Lattice parameter ( $a$ , Å) | X-ray density ( $d_{\text{X-ray}}$ ) ( $\text{gm}/\text{cm}^3$ ) |
|--------|-------------------------------|------------------------------|------------------------------------------------------------------|
| CoFe1  | 19.18                         | 8.3769                       | 5.301                                                            |
| CoFe2  | 19.14                         | 8.3719                       | 5.311                                                            |
| CoFe3  | 14.88                         | 8.3894                       | 5.278                                                            |

Table S4. Atomic position, occupancy, and agreement factors obtained for CoFe1, CoFe2, and CoFe3 from Rietveld Refinement.

| Atom         | Atomic position |   |   | Occupancy | Agreement factors |
|--------------|-----------------|---|---|-----------|-------------------|
|              | x               | y | z |           |                   |
| Sample CoFe1 |                 |   |   |           |                   |

|              |       |       |       |        |                  |
|--------------|-------|-------|-------|--------|------------------|
| Co1          | 0.000 | 0.000 | 0.000 | 0.0300 | $R_{wp}= 52.10$  |
| Fe1          | 0.000 | 0.000 | 0.000 | 0.0533 | $R_{exp}= 50.97$ |
| Co2          | 0.625 | 0.625 | 0.625 | 0.0133 | $R_B= 1.186$     |
| Fe2          | 0.625 | 0.625 | 0.625 | 0.0283 | $S = 1.0221$     |
| O1           | 0.247 | 0.247 | 0.247 | 0.1785 | $\chi^2= 1.04$   |
| Sample CoFe2 |       |       |       |        |                  |
| Co1          | 0.000 | 0.000 | 0.000 | 0.0300 | $R_{wp}= 63.70$  |
| Fe1          | 0.000 | 0.000 | 0.000 | 0.0533 | $R_{exp}= 63.26$ |
| Co2          | 0.625 | 0.625 | 0.625 | 0.0133 | $R_B= 1.142$     |
| Fe2          | 0.625 | 0.625 | 0.625 | 0.0283 | $S = 1.006$      |
| O1           | 0.240 | 0.240 | 0.240 | 0.1983 | $\chi^2= 1.01$   |
| Sample CoFe3 |       |       |       |        |                  |
| Co1          | 0.000 | 0.000 | 0.000 | 0.033  | $R_{wp}= 16.70$  |
| Fe1          | 0.000 | 0.000 | 0.000 | 0.053  | $R_{exp}= 15.98$ |
| Co2          | 0.625 | 0.625 | 0.625 | 0.013  | $R_B= 1.243$     |
| Fe2          | 0.625 | 0.625 | 0.625 | 0.028  | $S = 1.045$      |
| O1           | 0.245 | 0.245 | 0.245 | 0.1769 | $\chi^2= 1.10$   |

$R_{wp}$ : weighted profile factor,  $R_{exp}$ : expected weighted profile factor,  $R_B$ : Bragg factor,.

$S$ : Goodness of fit =  $R_{wp}/R_{exp}$ , reduced chi-square: ( $\chi^2$ ).

## 6. XPS

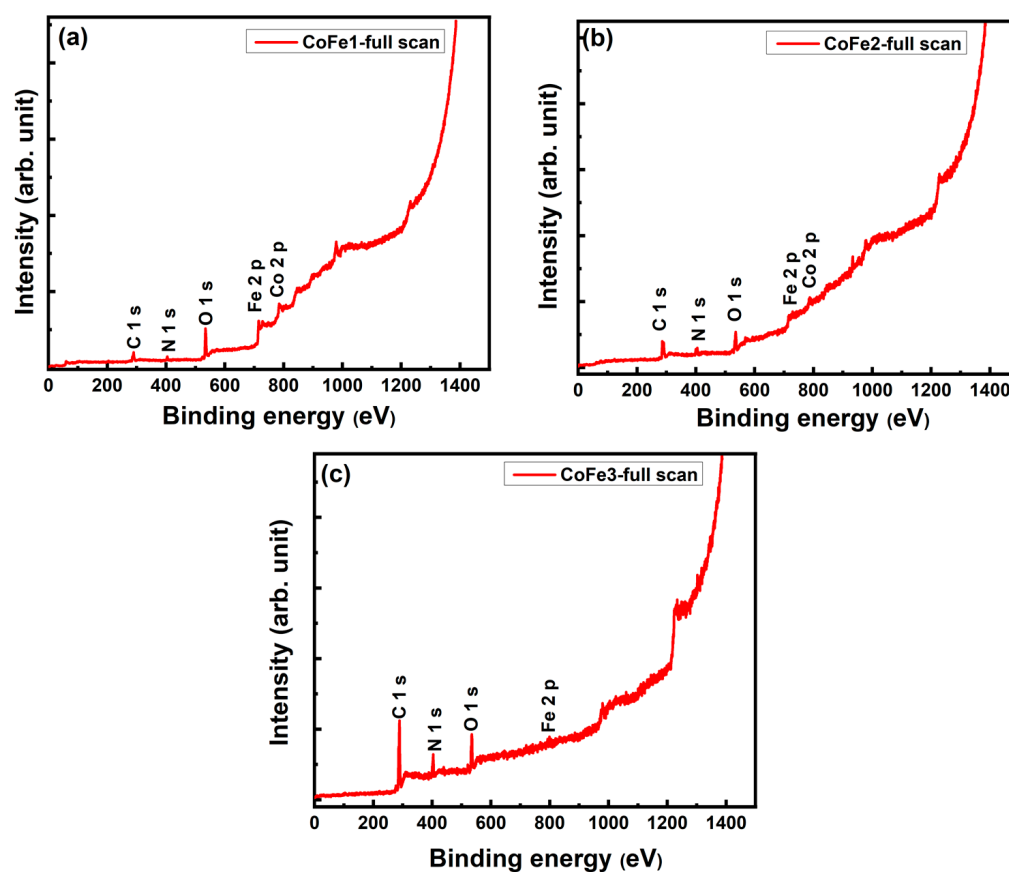

Figure S4. XPS survey spectra of CFO NPs.

## 7. Thermal Behavior - Thermogravimetric (TGA) Analysis

The number of OLA molecules per particle can be determined using the following formula [2] based on the weight loss.

$$N = \frac{W N_0 \rho (4/3) \pi R^3 \times 10^{-23}}{M} \quad (1)$$

Where  $N$  is the number of surfactant molecules (ligands) per particle,  $W$  is the weight loss in percent (%),  $N_0$  is Avogadro's number,  $\rho$  is the density of NPs,  $R$  is the average radius of the CFO NPs (obtained from SAXS analysis), and  $M$  is the molecular weight of OLA (267.49 g/mol).

## References

1. Ahrenstorf, K.; Heller, H.; Kornowski, A.; Broekaert, J.A.C.; Weller, H. Nucleation and Growth Mechanism of  $\text{Ni}_x\text{Pt}_{1-x}$  Nanoparticles. *Adv. Funct. Mater.* **2008**, *18*, 3850–3856, doi:<https://doi.org/10.1002/adfm.200800642>.
2. Ansari, S.M.; Sinha, B.B.; Phase, D.; Sen, D.; Sastry, P.U.; Kolekar, Y.D.; Ramana, C.V. Particle Size, Morphology, and Chemical Composition Controlled  $\text{CoFe}_2\text{O}_4$  Nanoparticles with Tunable Magnetic Properties via Oleic Acid Based Solvothermal Synthesis for Application in Electronic Devices. *ACS Appl. Nano Mater.* **2019**, *2*, 1828–1843, doi:10.1021/acsanm.8b02009.
